# Supplementary material for: Stable isotope paleoclimatology of the earliest Eocene using kimberlite-hosted mummified wood from the Canadian Subarctic
Source: Copernicus journal article supplement (doi:10.5194/bg-12-5899-2015), 2015-10-16
Supplement: Supplementary file 1 [file bg-12-5899-2015-supplement.zip]

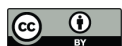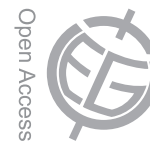

## *Supplement of*

# **Stable isotope paleoclimatology of the earliest Eocene using kimberlite-hosted mummified wood from the Canadian Subarctic**

**B. A. Hook et al.**

*Correspondence to:* B. A. Hook (benjamin.hook@utoronto.ca)

- bg-12-5899-2015-supplement-title-page.pdf
- EGU\_BG\_plotdata.xlsx
- \_\_MACOSX
  - .\_EGU\_BG\_plotdata.xlsx

The copyright of individual parts of the supplement might differ from the CC-BY 3.0 licence.
